# Supplementary material for: Genome-Wide Analysis of Single Nucleotide Polymorphisms Uncovers Population Structure in Northern Europe
Source: PLoS One. 2008 Oct 24;3(10):e3519. doi: 10.1371/journal.pone.0003519 (PMC2567036; doi:10.1371/journal.pone.0003519)
Supplement: Table S1 — Quality control parameters and the different datasets used in analyses (0.04 MB XLS) [file pone.0003519.s001.xls]

## Sheet: Sheet3
Dataset		original	filtered	sampled	no_maf, sampled	pruned	highly pruned
Analyses		-	hetero-zygosities, allele freqs	LD, QQ-plots	Monomorphs	IBS, inbreeding	FST, Structure
QC parameters	Sample call rate	-	>0.97	>0.97	>0.97	>0.97	>0.97
	Marker call rate1	-	>0.95	>0.95	>0.95	>0.95	>0.95
	HWE2	-	>0.001	>0.001	>0.001	>0.001	>0.001
	MAF3	-	>0.005	>0.005	any	>0.005	>0.1
	LD-pruning4	-	-	-	-	<0.2	<0.02
# samples and SNPs	FIW	141	141	113	113	141	141
	FIE	141	139	113	113	139	139
	SWE	114	113	113	113	113	113
	GER	258	256	113	113	256	256
	BRI	296	296	113	-	296	296
	CEU	60	-	-	-	58	58
	CHB+JPT	90	-	-	-	87	-
	YRI	60	-	-	-	57	-
	SNPs	238304	201011	201011	212310	68469	6369
1 Separately for SWE+FIW+FIE, GER, BRI and CEU+CHB+JPT+YRI
2 Separately for each population
3 For the whole dataset
4 Pairwise genotypic r2 (in Plink) for the whole dataset
Sample heterozygosity in the original data was 0.24 - 0.30 in FIW, FIE, SWE and GER.
From 8 sample pairs with high IBS, the sample with lower success rate was excluded;
the limit for high IBS was 0.77 for YRI, 0.791 for CHB+JPT, 0.778 for CEU and 0.782 for the other European populations.
