# Supplementary material for: Genome-Wide Analysis of Single Nucleotide Polymorphisms Uncovers Population Structure in Northern Europe
Source: PLoS One. 2008 Oct 24;3(10):e3519. doi: 10.1371/journal.pone.0003519 (PMC2567036; doi:10.1371/journal.pone.0003519)
Supplement: Table S2 — The number of SNPs per population that have a frequency deviation from CEU to the same or opposite direction as Asia (CHB+JPT). The markers with identical frequencies in either CEU and the studied population or CEU and CHB+JPT have been excluded. The proportions differ significantly (p<10-5). (0.02 MB XLS) [file pone.0003519.s002.xls]

## Sheet: Sheet1
	SNPs with frequency deviation
	towards Asia	away from Asia
FIW	111005 (60.1%)	73628 (39.9%)
FIE	112486 (61.0%)	71946 (39.0%)
SWE	107114 (58.1%)	77201 (41.9%)
GER	102218 (55.6%)	81596 (44.4%)
BRI	101565 (55.3%)	82062 (44.9%)
