# Supplementary material for: Genome-Wide Analysis of Single Nucleotide Polymorphisms Uncovers Population Structure in Northern Europe
Source: PLoS One. 2008 Oct 24;3(10):e3519. doi: 10.1371/journal.pone.0003519 (PMC2567036; doi:10.1371/journal.pone.0003519)
Supplement: Table S3 — Summary table of population statistics (0.02 MB XLS) [file pone.0003519.s003.xls]

## Sheet: Sheet1
			sample het1	marker het1
population	abbreviation	n			MAF2	F3
Western Finland	FIW	141	0.278281	0.304965	0.192857	0.0077169
Eastern Finland	FIE	139	0.276825	0.302158	0.190647	0.0056934
Sweden	SWE	113	0.277872	0.300885	0.192661	0.0037211
Northern Germany	GER	256	0.279321	0.304688	0.194118	0.00311972
Great Britain	BRI	296	0.279879	0.306897	0.194257	0.000493573
1 Median heterozygosity
2 Median minor allale frequency
3 Median inbreeding coefficient
